# Supplementary material
Source: publisher figshare collection journal article supplement (https://frontiersin.figshare.com/ndownloader/files/24382079)
Supplement: Supplementary file [file 24382079]

## Supplementary file 4.

Synthetic validation dataset: Two segmentation (s0218 and s0314) files containing objects with known numbers of pixels were generated and run through the Nutril Quantifier tool. Numerical results show correct calculations and attribution to the right atlas region.

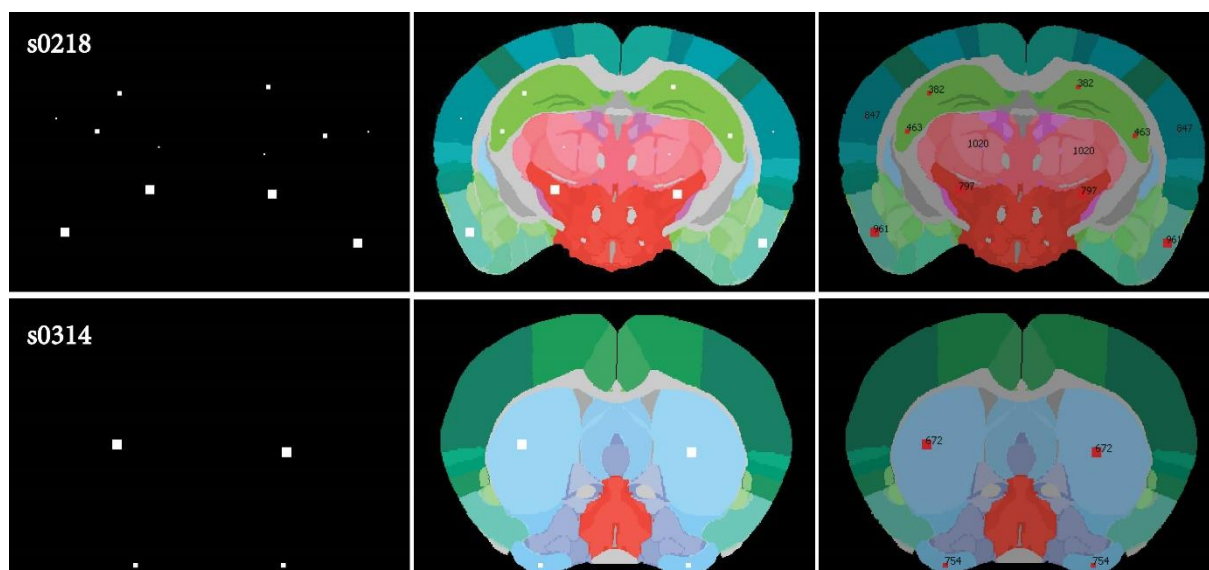

| Section ID | Object pixels | Object area | units  | Center X | Center Y | Region ID | Region Name                       |  |  |
|------------|---------------|-------------|--------|----------|----------|-----------|-----------------------------------|--|--|
| s0218      | 100           | 100         | pixels | 296,50   | 205,50   | 797       | Zona incerta                      |  |  |
| s0218      | 100           | 100         | pixels | 158,50   | 200,50   | 797       | Zona incerta                      |  |  |
| s0218      | 100           | 100         | pixels | 62,50    | 248,50   | 961       | Piriform area                     |  |  |
| s0218      | 100           | 100         | pixels | 392,50   | 260,50   | 961       | Piriform area                     |  |  |
| s0218      | 25            | 25          | pixels | 99,00    | 135,00   | 463       | Field CA3                         |  |  |
| s0218      | 25            | 25          | pixels | 356,00   | 140,00   | 463       | Field CA3                         |  |  |
| s0218      | 25            | 25          | pixels | 124,00   | 92,00    | 382       | Field CA1                         |  |  |
| s0218      | 25            | 25          | pixels | 292,00   | 85,00    | 382       | Field CA1                         |  |  |
| s0218      | 4             | 4           | pixels | 287,50   | 160,50   | 1020      | Posterior complex of the thalamus |  |  |
| s0218      | 4             | 4           | pixels | 168,50   | 152,50   | 1020      | Posterior complex of the thalamus |  |  |
| s0218      | 4             | 4           | pixels | 52,50    | 120,50   | 847       | Primary auditory area, layer 5    |  |  |
| s0218      | 4             | 4           | pixels | 404,50   | 135,50   | 847       | Primary auditory area, layer 5    |  |  |
| s0314      | 100           | 100         | pixels | 292,50   | 156,50   | 672       | Caudoputamen                      |  |  |
| s0314      | 100           | 100         | pixels | 113,50   | 148,50   | 672       | Caudoputamen                      |  |  |
| s0314      | 25            | 25          | pixels | 289,00   | 272,00   | 754       | Olfactory tubercle                |  |  |
| s0314      | 25            | 25          | pixels | 133,00   | 272,00   | 754       | Olfactory tubercle                |  |  |
